# Supplementary material
Source: PubMed Central journal article supplement (PMC2633857)
Supplement: pp.108.131128_1.pdf [file pp.108.131128_1.pdf]

## Supplemental Material

for *Plant Physiology* article

### **Analyses of advanced rice anther transcriptomes reveal global tapetum secretory functions and potential proteins for lipid exine formation**

by Ming-Der Huang et al.

List of Contents:

**Supplemental Table S1.** Top 50 transcripts in anther-minus-other-organs transcriptomes of various developmental stages.

Table S1-Meiosis

Table S1-Tetrad

Table S1-Early-Vacuolated

Table S1-Late-Vacuolated

Table S1-Mitosis

Table S1-Mature-Pollen

Table S1-Pollen (Pollen-minus-other-organs)

**Supplemental Table S2.** Tapetum-specific transcripts in anther-minus-pollen transcriptomes.

**Supplemental Table S3.** Abundant transcripts encoding secretory proteins from anther-minus-other-organs transcriptomes.

**Supplemental Table S4.** Characteristics of anther samples

**Supplemental Table S5.** Primers used in RT-PCR.





Table S1-Early-Vacuolated

| TIGR_gene  | Annotation                                      | SBS                |        |            |           |         |               |        | MPSS         |            |            |             |             |      |                  |                |        |                 | Insertion mutant | Activation mutant |
|------------|-------------------------------------------------|--------------------|--------|------------|-----------|---------|---------------|--------|--------------|------------|------------|-------------|-------------|------|------------------|----------------|--------|-----------------|------------------|-------------------|
|            |                                                 | Developing anthers |        |            |           |         |               | Pollen | Germina seed | Young leaf | Young root | Mature leaf | Mature root | Stem | Immature panicle | Ovary & stigma | Pollen |                 |                  |                   |
|            |                                                 | Meiosis            | Tetrad | Early vacu | Late vacu | Mitosis | Mature pollen |        |              |            |            |             |             |      |                  |                |        |                 |                  |                   |
| Os03g59380 | Lipid-transfer protein                          | 1,358              | 17,792 | 20,728     | 35,555    | 512     | 169           | 1      | 0            | 0          | 0          | 0           | 0           | 0    | 0                | 399            | 29     | 3               |                  | TRIM              |
| Os01g41710 | Chlorophyll a-b binding protein                 | 1,373              | 11,472 | 17,209     | 17,289    | 2,617   | 45            | 0      | 29           | 20         | 0          | 0           | 0           | 0    | 0                | 369            | 55     | 0               | PFG, TRIM        |                   |
| Os09g35700 | Lipid-transfer protein                          | 16,153             | 49,751 | 13,603     | 81        | 1       | 4             | 1      | 0            | 0          | 0          | 0           | 0           | 0    | 0                | 708            | 0      | 0               |                  |                   |
| Os01g41170 | Unknown protein                                 | 0                  | 1,914  | 8,675      | 22,039    | 1,105   | 7             | 0      | 0            | 0          | 0          | 0           | 0           | 0    | 0                | 318            | 0      | 242             | PFG              |                   |
| Os07g37850 | Unknown protein                                 | 143                | 23     | 7,997      | 31        | 0       | 0             | 0      | 0            | 0          | 0          | 0           | 0           | 0    | 23               | 1,410          | 10     | 0               |                  | TRIM              |
| Os08g45150 | Proline-rich protein                            | 6                  | 1,413  | 5,527      | 2,515     | 1       | 1             | 3      | 0            | 0          | 0          | 0           | 0           | 0    | 0                | 256            | 0      | 0               | RMD, UCD         |                   |
| Os02g45530 | Glucose-methanol-choline oxidoreductase         | 131                | 7,496  | 3,672      | 4         | 0       | 0             | 0      | 0            | 0          | 0          | 0           | 0           | 0    | 0                | 0              | 0      | 0               | TRIM             | TRIM              |
| Os05g40010 | Lipid-transfer protein                          | 5                  | 381    | 3,165      | 2,495     | 15      | 90            | 0      | 0            | 0          | 0          | 0           | 5           | 0    | 0                | 18             | 17     | CSIRO           |                  |                   |
| Os02g01980 | Proline-rich protein                            | 1                  | 131    | 2,831      | 0         | 0       | 0             | 4      | 0            | 0          | 0          | 0           | 0           | 0    | 96               | 0              | 0      |                 |                  |                   |
| Os10g42620 | Dihydroflavonol-4-reductase                     | 9                  | 4,613  | 2,445      | 345       | 7       | 1             | 1      | 22           | 0          | 0          | 0           | 0           | 8    | 26               | 3              | 0      | PFG, RMD, TRIM  |                  | TRIM              |
| Os07g46210 | Unknown protein                                 | 2                  | 5,127  | 2,210      | 26        | 0       | 0             | 0      | 0            | 0          | 0          | 0           | 0           | 0    | 25               | 0              | 0      |                 |                  | TRIM              |
| Os04g33930 | Lipid binding protein                           | 0                  | 0      | 2,114      | 38        | 1       | 0             | 0      | 0            | 0          | 0          | 0           | 0           | 0    | 0                | 0              | 0      | 0               | PFG              | TRIM              |
| Os02g09420 | Cyclase                                         | 116                | 5      | 2,015      | 2         | 0       | 0             | 0      | 0            | 0          | 0          | 0           | 0           | 0    | 0                | 15             | 0      |                 |                  |                   |
| Os01g09320 | NADP-dependent malic enzyme                     | 909                | 876    | 1,960      | 527       | 85      | 44            | 43     | 0            | 24         | 42         | 0           | 54          | 38   | 25               | 105            | 0      |                 |                  |                   |
| Os02g01190 | Unknown protein                                 | 80                 | 146    | 1,747      | 0         | 0       | 0             | 0      | 0            | 0          | 0          | 0           | 0           | 0    | 508              | 0              | 0      | RMD, TRIM       |                  |                   |
| Os01g37950 | Unknown protein                                 | 392                | 789    | 1,700      | 4,045     | 214     | 797           | 4      | 19           | 0          | 0          | 0           | 2           | 36   | 22               | 0              | 0      |                 |                  |                   |
| Os07g37100 | Nucleoside transporter                          | 28                 | 275    | 1,650      | 316       | 24      | 30            | 44     | 96           | 110        | 0          | 10          | 21          | 0    | 0                | 4              | 3      | PFG, RTIM, TRIM |                  | TRIM              |
| Os01g03670 | Dihydroflavonol-4-reductase                     | 47                 | 11,738 | 1,649      | 16        | 5       | 3             | 1      | 0            | 0          | 0          | 0           | 0           | 0    | 117              | 0              | 0      |                 |                  |                   |
| Os08g41950 | SRF-type transcription factor                   | 1,720              | 119    | 1,621      | 67        | 26      | 28            | 13     | 0            | 0          | 0          | 0           | 0           | 0    | 17               | 297            | 10     | PFG, TRIM, UCD  |                  | TRIM              |
| Os08g03520 | Glycine-rich protein 2b                         | 1,782              | 2,108  | 1,598      | 3,136     | 206     | 66            | 2      | 47           | 15         | 0          | 0           | 72          | 87   | 69               | 167            | 0      |                 |                  |                   |
| Os12g18960 | Nodulin-like protein                            | 240                | 426    | 1,584      | 2,987     | 763     | 439           | 2      | 0            | 0          | 0          | 0           | 0           | 0    | 0                | 0              | 0      | 22              | PFG              |                   |
| Os03g10320 | Unknown protein                                 | 6                  | 0      | 1,332      | 2         | 0       | 0             | 0      | 0            | 4          | 0          | 0           | 0           | 0    | 0                | 0              | 0      | 6               | PFG              | TRIM              |
| Os05g35740 | Subtilisin propeptide domain containing protein | 73                 | 35     | 1,318      | 87        | 27      | 16            | 1      | 58           | 54         | 0          | 0           | 0           | 0    | 2                | 0              | 0      | PFG             |                  |                   |
| Os08g43290 | Lipid-transfer protein                          | 554                | 6,768  | 1,261      | 28        | 0       | 0             | 0      | 0            | 0          | 0          | 0           | 0           | 0    | 3,537            | 0              | 0      |                 |                  | TRIM              |
| Os02g30200 | PE-PGRS family protein                          | 5                  | 296    | 1,241      | 1,775     | 49      | 8             | 2      | 0            | 0          | 0          | 0           | 0           | 0    | 0                | 0              | 0      | 0               | PFG, UCD         | TRIM              |
| Os03g39610 | Chlorophyll a-b binding protein                 | 569                | 1,070  | 1,205      | 716       | 248     | 4             | 0      | 0            | 0          | 0          | 0           | 0           | 0    | 346              | 97             | 0      | PFG             |                  |                   |
| Os03g08790 | Aspartic proteinase                             | 61                 | 158    | 1,128      | 1         | 0       | 0             | 0      | 33           | 0          | 0          | 0           | 4           | 137  | 123              | 12             | 0      | Genoplante      |                  | TRIM              |
| Os02g49870 | Unknown protein                                 | 194                | 2      | 1,127      | 4         | 0       | 0             | 0      | 0            | 9          | 0          | 0           | 0           | 117  | 0                | 9              | 0      |                 |                  | TRIM              |
| Os10g37420 | Cytochrome b5                                   | 246                | 648    | 951        | 587       | 70      | 70            | 0      | 0            | 6          | 0          | 0           | 0           | 0    | 0                | 0              | 0      | GSNU            |                  | TRIM              |
| Os05g07700 | 60S ribosomal protein L10-3                     | 555                | 1,323  | 924        | 1,716     | 411     | 117           | 6      | 5            | 20         | 0          | 1           | 14          | 0    | 10               | 0              | 0      | PFG, TRIM       |                  | TRIM              |
| Os03g47910 | Unknown protein                                 | 807                | 2,357  | 923        | 3         | 0       | 0             | 0      | 0            | 0          | 0          | 0           | 0           | 0    | 489              | 0              | 0      |                 |                  |                   |
| Os08g03450 | 60S ribosomal protein L37                       | 751                | 1,562  | 912        | 1,887     | 411     | 72            | 7      | 10           | 9          | 0          | 0           | 2           | 0    | 0                | 11             | 0      | RMD             |                  |                   |
| Os09g35800 | UDP-glucose 4-epimerase                         | 28                 | 103    | 895        | 1,229     | 10      | 6             | 4      | 0            | 19         | 0          | 0           | 0           | 0    | 0                | 0              | 0      | TRIM            |                  | TRIM              |
| Os08g29770 | Endoglucanase                                   | 0                  | 402    | 876        | 1,017     | 164     | 63            | 0      | 0            | 16         | 0          | 0           | 0           | 0    | 0                | 0              | 0      | PFG             |                  |                   |
| Os06g12320 | Amino acid/polyamine transporter                | 1                  | 140    | 873        | 543       | 11      | 0             | 0      | 0            | 20         | 0          | 0           | 0           | 0    | 0                | 0              | 0      | PFG             |                  |                   |
| Os06g12350 | Amino acid transporter                          | 0                  | 4      | 870        | 84        | 3       | 1             | 0      | 0            | 0          | 0          | 0           | 0           | 0    | 0                | 0              | 0      | PFG             |                  |                   |
| Os02g07820 | Unknown protein                                 | 12                 | 270    | 831        | 2,719     | 245     | 71            | 0      | 0            | 0          | 0          | 0           | 0           | 0    | 0                | 0              | 0      | 6               |                  |                   |
| Os03g15710 | Strictosidine synthase                          | 33                 | 942    | 830        | 43        | 5       | 1             | 0      | 0            | 0          | 0          | 0           | 0           | 0    | 22               | 0              | 0      |                 |                  |                   |
| Os08g03682 | Cytochrome P450                                 | 43                 | 1,705  | 812        | 5         | 1       | 0             | 2      | 0            | 0          | 0          | 0           | 0           | 3    | 469              | 0              | 0      |                 |                  |                   |
| Os01g56530 | LOB domain protein                              | 0                  | 849    | 808        | 62        | 1       | 1             | 0      | 0            | 0          | 0          | 0           | 0           | 0    | 0                | 0              | 0      | TRIM            |                  |                   |
| Os03g18420 | NADH-ubiquinone oxidoreductase                  | 386                | 98     | 786        | 48        | 114     | 38            | 35     | 38           | 0          | 0          | 0           | 0           | 17   | 92               | 30             | 56     | PFG             |                  |                   |
| Os01g05670 | 3-oxo-5-alpha-steroid 4-dehydrogenase           | 275                | 1,217  | 772        | 398       | 72      | 23            | 1      | 0            | 0          | 0          | 0           | 1           | 0    | 29               | 21             | 0      | PFG, RMD, RTIM  |                  | TRIM              |
| Os05g30580 | Subtilisin-like protease                        | 0                  | 2      | 748        | 1         | 0       | 0             | 0      | 0            | 0          | 0          | 0           | 0           | 0    | 0                | 0              | 0      | PFG             |                  | TRIM              |
| Os10g25230 | ZIM motif family protein                        | 453                | 425    | 743        | 2,315     | 146     | 42            | 13     | 0            | 0          | 0          | 0           | 0           | 8    | 0                | 14             | 0      |                 |                  | TRIM              |
| Os06g40150 | Ethylene responsive element                     | 11                 | 67     | 733        | 72        | 1       | 0             | 0      | 0            | 0          | 0          | 0           | 0           | 0    | 6                | 0              | 0      | PFG, TRIM       |                  | TRIM              |
| Os01g53240 | RD22-like protein                               | 108                | 10     | 732        | 108       | 0       | 0             | 1      | 16           | 0          | 0          | 0           | 0           | 21   | 366              | 0              | 0      |                 |                  |                   |
| Os06g42310 | β-galactosidase                                 | 0                  | 1      | 732        | 5         | 0       | 0             | 40     | 0            | 0          | 0          | 0           | 0           | 0    | 0                | 0              | 0      |                 |                  |                   |
| Os12g37870 | ATP-citrate synthase                            | 380                | 259    | 726        | 601       | 106     | 43            | 27     | 0            | 0          | 10         | 0           | 0           | 0    | 0                | 0              | 0      | PFG, TRIM       |                  | TRIM              |
| Os11g09280 | Protein disulfide isomerase                     | 921                | 182    | 707        | 215       | 13      | 8             | 0      | 0            | 0          | 0          | 5           | 0           | 7    | 12               | 55             | 0      | PFG             |                  |                   |
| Os11g41610 | 40S ribosomal protein S29                       | 791                | 916    | 704        | 2,387     | 641     | 87            | 4      | 0            | 14         | 0          | 0           | 2           | 0    | 0                | 19             | 0      | RMD, ZJU        |                  |                   |











**Table S2.** *Anther-minus-pollen transcripts whose ortholog transcripts/proteins are known to be present in or restricted to the tapeta in anthers of different species.* Anther-minus-pollen transcripts are those that possess TPM >5X those in pollen. Their presence in various anther, pollen (current SBS results) and other organs (reported MPSS results) transcriptomes are shown. Rice ortholog transcripts with TPM lower than 20 are excluded to avoid background noises.

| Transcripts of rice genes | Transcripts/proteins of rice orthologs known to be restricted to the tapetum in anthers | SBS                |        |            |           |         |               |        | MPSS         |            |            |             |             |       |                  |                |        |   |
|---------------------------|-----------------------------------------------------------------------------------------|--------------------|--------|------------|-----------|---------|---------------|--------|--------------|------------|------------|-------------|-------------|-------|------------------|----------------|--------|---|
|                           |                                                                                         | Developing anthers |        |            |           |         |               | Pollen | Germina seed | Young leaf | Young root | Mature leaf | Mature root | Stem  | Immature panicle | Ovary & stigma | Pollen |   |
|                           |                                                                                         | Meio               | Tetrad | Early vacu | Late Vacu | Mitosis | Mature pollen |        |              |            |            |             |             |       |                  |                |        |   |
| TPM                       |                                                                                         |                    |        |            |           |         |               |        |              |            |            |             |             |       |                  |                |        |   |
| Os01g49650                | TomA5B (Tomato) <sup>1</sup>                                                            | 2,632              | 1,850  | 39         | 9         | 0       | 0             | 0      | 0            | 0          | 0          | 0           | 0           | 0     | 0                | 1,591          | 0      | 0 |
| Os03g18850                | LLA-15 (Lily) <sup>2</sup>                                                              | 24                 | 2      | 1          | 2         | 0       | 0             | 1      | 0            | 0          | 13         | 0           | 3           | 0     | 0                | 25             | 0      | 0 |
| Os03g59380                | bvLTP-1 (Sugar beet) <sup>3</sup>                                                       | 1,358              | 17,792 | 20,728     | 35,555    | 512     | 169           | 1      | 0            | 0          | 0          | 0           | 0           | 0     | 0                | 399            | 29     | 3 |
| Os03g07140                | MS2 (Arabidopsis) <sup>4</sup>                                                          | 2                  | 40     | 624        | 1         | 2       | 0             | 1      | 0            | 0          | 0          | 0           | 0           | 0     | 0                | 274            | 0      | 0 |
| Os04g39470                | AtMYB103 (Arabidopsis) <sup>5</sup>                                                     | 5                  | 59     | 1          | 0         | 0       | 0             | 0      | 0            | 2          | 0          | 0           | 0           | 0     | 2                | 0              | 0      | 0 |
| Os07g22850                | PrChS1 ( <i>Pinus radiata</i> ) <sup>6</sup>                                            | 92                 | 12     | 68         | 0         | 0       | 0             | 0      | 0            | 0          | 0          | 0           | 0           | 0     | 99               | 0              | 0      | 0 |
| Os07g37090                | RA39 (Rice) <sup>7</sup>                                                                | 0                  | 143    | 293        | 0         | 0       | 0             | 0      | 0            | 0          | 0          | 0           | 0           | 0     | 174              | 0              | 0      | 0 |
| Os08g03682                | CYP703 (Arabidopsis) <sup>8</sup>                                                       | 43                 | 1,705  | 812        | 5         | 1       | 0             | 2      | 0            | 0          | 0          | 0           | 0           | 3     | 469              | 0              | 0      | 0 |
| Os08g38810                | RAFTIN (Rice) <sup>9</sup>                                                              | 35                 | 25     | 136        | 47        | 0       | 0             | 0      | 0            | 0          | 0          | 0           | 0           | 0     | 609              | 0              | 0      | 0 |
| Os08g43290                | Osc4 (Rice) <sup>10</sup>                                                               | 554                | 6,768  | 1,261      | 28        | 0       | 0             | 0      | 0            | 0          | 0          | 0           | 0           | 0     | 3,537            | 0              | 0      | 0 |
| Os09g27620                | MS1 (Arabidopsis) <sup>11</sup>                                                         | 1                  | 356    | 53         | 0         | 0       | 0             | 1      | 0            | 0          | 0          | 0           | 0           | 0     | 0                | 0              | 0      | 0 |
| Os09g35700                | YY1 (Rice) <sup>12</sup>                                                                | 16,153             | 49,751 | 13,603     | 81        | 1       | 4             | 1      | 0            | 0          | 0          | 0           | 0           | 0     | 708              | 0              | 0      | 0 |
|                           | Toma108z (Tomato) <sup>13</sup>                                                         |                    |        |            |           |         |               |        |              |            |            |             |             |       |                  |                |        |   |
|                           | Mzm3-3 (Maize) <sup>14</sup>                                                            |                    |        |            |           |         |               |        |              |            |            |             |             |       |                  |                |        |   |
| Os10g34360                | YY2 (Rice) <sup>12</sup>                                                                | 5                  | 134    | 78         | 0         | 0       | 0             | 0      | 0            | 0          | 0          | 0           | 0           | 0     | 1,333            | 0              | 0      | 0 |
|                           | PrChS1 ( <i>Pinus radiata</i> ) <sup>6</sup>                                            |                    |        |            |           |         |               |        |              |            |            |             |             |       |                  |                |        |   |
| Os01g68870                | MSP1 (Rice) <sup>15</sup>                                                               | 25                 | 32     | 12         | 9         | 3       | 1             | 0      | 0            | 0          | 0          | 0           | 0           | 24    | 3                | 40             | 0      | 0 |
|                           | EMS/EXS (Arabidopsis) <sup>16</sup>                                                     |                    |        |            |           |         |               |        |              |            |            |             |             |       |                  |                |        |   |
| Os02g02820                | TDR (Rice) <sup>17</sup>                                                                | 97                 | 3      | 110        | 1         | 0       | 0             | 0      | 0            | 0          | 0          | 0           | 0           | 0     | 110              | 0              | 0      | 0 |
|                           | DYT1 (Arabidopsis) <sup>18</sup>                                                        |                    |        |            |           |         |               |        |              |            |            |             |             |       |                  |                |        |   |
| Os02g53200                | Tag1 (Tobacco) <sup>19</sup>                                                            | 30                 | 1      | 1          | 0         | 0       | 0             | 0      | 227          | 24         | 22         | 4           | 78          | 253   | 386              | 224            | 1      | 0 |
| Os04g38480                | SERK1 (Arabidopsis) <sup>20</sup>                                                       | 22                 | 13     | 14         | 15        | 15      | 6             | 1      | 0            | 0          | 0          | 0           | 24          | 0     | 0                | 0              | 0      | 0 |
| Os04g57490                | OsCPI1 (Rice) <sup>21</sup>                                                             | 0                  | 1      | 44         | 0         | 0       | 0             | 0      | 0            | 0          | 0          | 0           | 0           | 0     | 0                | 0              | 0      | 0 |
| Os06g06980                | AtTSM1 (Arabidopsis) <sup>22</sup>                                                      | 70                 | 1      | 9          | 1         | 0       | 1             | 0      | 519          | 305        | 210        | 269         | 295         | 1,323 | 1,367            | 259            | 0      | 0 |
| Os09g32550                | A6 (Arabidopsis) <sup>23</sup>                                                          | 59                 | 24     | 7          | 18        | 7       | 3             | 0      | 0            | 0          | 0          | 0           | 0           | 0     | 25               | 77             | 0      | 0 |
| Os09g30320                | RA8 (Rice) <sup>24</sup>                                                                | 6                  | 152    | 283        | 166       | 4       | 0             | 0      | 0            | 0          | 0          | 0           | 0           | 0     | 636              | 2              | 213    | 0 |
| Os09g36730                | AtMYB32 (Arabidopsis) <sup>25</sup>                                                     | 11                 | 148    | 139        | 19        | 0       | 0             | 0      | 190          | 29         | 471        | 2           | 204         | 68    | 361              | 0              | 0      | 0 |
| Os12g02310                | PrLTP1 ( <i>Pinus radiata</i> ) <sup>6</sup>                                            | 23                 | 0      | 8          | 0         | 0       | 4             | 0      | 704          | 316        | 0          | 0           | 0           | 605   | 206              | 0              | 0      | 0 |

References (according to the superscript numbers):

- Aguirre PJ, Smith AG (1993)** Molecular characterization of a gene encoding a cysteine-rich protein preferentially expressed in anthers of *Lycopersicon esculentum*. *Plant Mol Biol* **23**: 477-487
- Wang CS, Walling LL, Eckard KJ, Lord EM (1992)** Immunological characterization of a tapetal protein in developing anthers of *Lilium longiflorum*. *Plant Physiol* **99**: 822-829
- Matsuhira H, Shinada H, Yui-Kurino R, Hamato N, Umeda M, Mikami T, Kubo T (2007)** An anther-specific lipid transfer protein gene in sugar beet: its expression is strongly reduced in male-sterile plants with Owen cytoplasm. *Physiol Plant* **129**: 407-414
- Aarts MG, Hodge R, Kalantidis K, Florack D, Wilson ZA, Mulligan BJ, Stiekema WJ, Scott R,**

- Pereira A** (1997) The *Arabidopsis* MALE STERILITY 2 protein shares similarity with reductases in elongation/condensation complexes. *Plant J* **12**: 615-623
5. **Li SF, Higginson T, Parish RW** (1999) A novel MYB-related gene from *Arabidopsis thaliana* expressed in developing anthers. *Plant Cell Physiol* **40**: 343-347
  6. **Walden AR, Walter C, Gardner RC** (1999) Genes expressed in *Pinus radiata* male cones include homologs to anther-specific and pathogenesis response genes. *Plant Physiol* **121**: 1103-1116
  7. **Ding ZJ, Wu XH, Tai W** (2002) The rice tapetum-specific gene RA39 encodes a type I ribosome-inactivating protein. *Sex Plant Reprod* **15**: 205-212
  8. **Morant M, Jorgensen K, Schaller H, Pinot F, Moller BL, Werck-Reichhart D, Bak S** (2007) CYP703 is an ancient cytochrome P450 in land plants catalyzing in-chain hydroxylation of lauric acid to provide building blocks for sporopollenin synthesis in pollen. *Plant Cell* **19**: 1473-1487
  9. **Wang A, Xia Q, Xie W, Datla R, Selvaraj G** (2003) The classical Ubisch bodies carry a sporophytically produced structural protein (RAFTIN) that is essential for pollen development. *Proc Natl Acad Sci U S A* **100**: 14487-14492
  10. **Tsuchiya T, Toriyama K, Ejiri S, Hinata K** (1994) Molecular characterization of rice genes specifically expressed in the anther tapetum. *Plant Mol Biol* **26**: 1737-1746
  11. **Ito T, Shinozaki K** (2002) The MALE STERILITY1 gene of *Arabidopsis*, encoding a nuclear protein with a PHD-finger motif, is expressed in tapetal cells and is required for pollen maturation. *Plant Cell Physiol* **43**: 1285-1292
  12. **Hihara Y, Hara C, Uchimiya H** (1996) Isolation and characterization of two cDNA clones for mRNAs that are abundantly expressed in immature anthers of rice (*Oryza sativa* L.). *Plant Mol Biol* **30**: 1181-1193
  13. **Chen R, Smith AG** (1993) Nucleotide sequence of a stamen- and tapetum-specific gene from *Lycopersicon esculentum*. *Plant Physiol* **101**: 1413
  14. **Lauga B, Charbonnel-Campaa L, Combes D** (2000) Characterization of MZm3-3, a *Zea mays* tapetum-specific transcript. *Plant Sci* **157**: 65-75
  15. **Nonomura K, Miyoshi K, Eiguchi M, Suzuki T, Miyao A, Hirochika H, Kurata N** (2003) The MSP1 gene is necessary to restrict the number of cells entering into male and female sporogenesis and to initiate

- anther wall formation in rice. *Plant Cell* **15**: 1728-1739
16. **Zhao DZ, Wang GF, Speal B, Ma H** (2002) The excess microsporocytes1 gene encodes a putative leucine-rich repeat receptor protein kinase that controls somatic and reproductive cell fates in the *Arabidopsis* anther. *Genes Dev* **16**: 2021-2031
  17. **Li N, Zhang DS, Liu HS, Yin CS, Li XX, Liang WQ, Yuan Z, Xu B, Chu HW, Wang J, Wen TQ, Huang H, Luo D, Ma H, Zhang DB** (2006) The rice tapetum degeneration retardation gene is required for tapetum degradation and anther development. *Plant Cell* **18**: 2999-3014
  18. **Zhang W, Sun Y, Timofejeva L, Chen C, Grossniklaus U, Ma H** (2006) Regulation of *Arabidopsis* tapetum development and function by DYSFUNCTIONAL TAPETUM1 (DYT1) encoding a putative bHLH transcription factor. *Development* **133**: 3085-3095
  19. **Bucciaglia PA, Smith AG** (1994) Cloning and characterization of Tag 1, a tobacco anther beta-1,3-glucanase expressed during tetrad dissolution. *Plant Mol Biol* **24**: 903-914
  20. **Colcombet J, Boisson-Dernier A, Ros-Palau R, Vera CE, Schroeder JI** (2005) *Arabidopsis* SOMATIC EMBRYOGENESIS RECEPTOR KINASES1 and 2 are essential for tapetum development and microspore maturation. *Plant Cell* **17**: 3350-3361
  21. **Lee S, Jung KH, An G, Chung YY** (2004) Isolation and characterization of a rice cysteine protease gene, OsCP1, using T-DNA gene-trap system. *Plant Mol Biol* **54**: 755-765
  22. **Fellenberg C, Milkowski C, Hause B, Lange PR, Bottcher C, Schmidt J, Vogt T** (2008) Tapetum-specific location of a cation-dependent O-methyltransferase in *Arabidopsis thaliana*. *Plant J* **56**: 132-145
  23. **Hird DL, Worrall D, Hodge R, Smartt S, Paul W, Scott R** (1993) The anther-specific protein encoded by the *Brassica napus* and *Arabidopsis thaliana* A6 gene displays similarity to beta-1,3-glucanases. *Plant J* **4**: 1023-1033
  24. **Jeon JS, Chung YY, Lee S, Yi GH, Oh BG, An G** (1999) Isolation and characterization of an anther-specific gene, RA8, from rice (*Oryza sativa* L.). *Plant Mol Biol* **39**: 35-44
  25. **Preston J, Wheeler J, Heazlewood J, Li SF, Parish RW** (2004) AtMYB32 is required for normal pollen development in *Arabidopsis thaliana*. *Plant J* **40**: 979-995

**Table S3.** *Anther-minus-other-organs transcripts with TPM ≥100 that encode secretory proteins.*

Transcripts with TPM ≥1,000 are shaded.

| TIGR_gene  | Annotation                    | SBS                |        |            |           |         |               | MPSS    |       |       |        |        |         |          |         |        |
|------------|-------------------------------|--------------------|--------|------------|-----------|---------|---------------|---------|-------|-------|--------|--------|---------|----------|---------|--------|
|            |                               | Developing anthers |        |            |           |         | Pollen        | Germina | Young | Young | Mature | Mature | Stem    | Immature | Ovary & | Pollen |
|            |                               | Meiosis            | Tetrad | Early vacu | Late Vacu | Mitosis | Mature pollen | seed    | leaf  | root  | leaf   | root   | panicle | stigma   |         |        |
|            |                               | TPM                |        |            |           |         |               |         |       |       |        |        |         |          |         |        |
| Os01g11710 | Esterase                      | 67                 | 146    | 62         | 31        | 5       | 7             | 0       | 0     | 0     | 0      | 0      | 0       | 0        | 0       | 0      |
| Os01g12020 | Lipid-transfer protein        | 9,549              | 9,683  | 105        | 29        | 19      | 8             | 0       | 0     | 0     | 0      | 0      | 0       | 120      | 0       |        |
| Os01g13200 | Unknown protein               | 204                | 5      | 210        | 2         | 1       | 0             | 15      | 0     | 5     | 0      | 0      | 14      | 0        | 23      |        |
| Os01g14880 | Hypothetical protein          | 0                  | 813    | 361        | 2         | 0       | 0             | 0       | 0     | 0     | 0      | 0      | 0       | 125      | 0       |        |
| Os01g14940 | Pectinesterase inhibitor      | 0                  | 0      | 0          | 8         | 4,562   | 2,223         | 183     | 0     | 0     | 0      | 0      | 0       | 0        | 33      |        |
| Os01g15610 | Unknown protein               | 25                 | 40     | 27         | 146       | 3,619   | 250           | 9       | 0     | 0     | 0      | 1      | 0       | 0        | 0       |        |
| Os01g15830 | Peroxidase                    | 408                | 1      | 175        | 0         | 0       | 0             | 0       | 0     | 0     | 0      | 1      | 0       | 0        | 0       |        |
| Os01g15970 | Unknown protein               | 82                 | 179    | 4          | 4         | 0       | 0             | 8       | 8     | 5     | 0      | 0      | 2       | 0        | 0       |        |
| Os01g22380 | Unknown protein               | 376                | 3      | 7          | 0         | 0       | 0             | 0       | 0     | 0     | 0      | 0      | 0       | 39       | 0       |        |
| Os01g33670 | Unknown protein               | 0                  | 15     | 93         | 233       | 0       | 52            | 0       | 0     | 0     | 0      | 0      | 0       | 7        | 0       |        |
| Os01g34920 | β-galactosidase               | 0                  | 6      | 252        | 37        | 0       | 0             | 0       | 0     | 0     | 0      | 0      | 0       | 0        | 24      |        |
| Os01g49650 | Lipid-transfer protein        | 2,632              | 1,850  | 39         | 9         | 0       | 0             | 0       | 0     | 0     | 0      | 0      | 1,591   | 0        | 0       |        |
| Os01g53240 | RD22-like protein             | 108                | 10     | 732        | 108       | 0       | 0             | 1       | 16    | 0     | 0      | 0      | 21      | 366      | 0       |        |
| Os01g66700 | β-hexosaminidase              | 730                | 96     | 43         | 4         | 8       | 10            | 2       | 0     | 0     | 0      | 0      | 98      | 0        | 12      |        |
| Os01g68589 | Lipid-transfer protein        | 129                | 0      | 41         | 0         | 0       | 0             | 0       | 4     | 0     | 8      | 0      | 0       | 16       | 0       |        |
| Os02g01190 | Unknown protein               | 80                 | 146    | 1,747      | 0         | 0       | 0             | 0       | 0     | 0     | 0      | 0      | 508     | 0        | 0       |        |
| Os02g10520 | Protease                      | 2                  | 90     | 626        | 19        | 0       | 0             | 0       | 0     | 0     | 0      | 0      | 7       | 0        | 0       |        |
| Os02g12270 | Hypothetical protein          | 0                  | 0      | 20         | 261       | 16      | 1             | 0       | 0     | 0     | 0      | 0      | 0       | 0        | 0       |        |
| Os02g22480 | Glycosyltransferase           | 98                 | 129    | 103        | 106       | 45      | 36            | 0       | 0     | 0     | 0      | 0      | 0       | 13       | 16      |        |
| Os02g28970 | Unknown protein               | 247                | 41     | 2          | 0         | 0       | 0             | 0       | 0     | 0     | 0      | 0      | 0       | 0        | 0       |        |
| Os02g40440 | Proline-rich protein          | 74                 | 2      | 291        | 2         | 0       | 0             | 0       | 0     | 0     | 0      | 0      | 31      | 3        | 0       |        |
| Os02g42310 | Serine carboxypeptidase       | 11                 | 0      | 285        | 6         | 0       | 0             | 0       | 15    | 0     | 0      | 0      | 16      | 6        | 0       |        |
| Os02g45530 | GMC oxidoreductase            | 131                | 7,496  | 3,672      | 4         | 0       | 0             | 0       | 0     | 0     | 0      | 0      | 0       | 0        | 0       |        |
| Os02g48110 | Heat shock protein            | 254                | 293    | 12         | 136       | 90      | 10            | 5       | 10    | 0     | 0      | 19     | 5       | 20       | 0       |        |
| Os03g08790 | Aspartic proteinase           | 61                 | 158    | 1,128      | 1         | 0       | 0             | 0       | 33    | 0     | 0      | 0      | 4       | 137      | 123     |        |
| Os03g24300 | Hypothetical protein          | 918                | 77     | 16         | 0         | 0       | 0             | 0       | 0     | 0     | 0      | 0      | 263     | 0        | 0       |        |
| Os03g24910 | Unknown protein               | 181                | 125    | 2          | 20        | 1       | 0             | 0       | 14    | 0     | 0      | 0      | 1       | 0        | 4       |        |
| Os03g26430 | Aldose 1-epimerase            | 6                  | 0      | 272        | 0         | 0       | 1             | 0       | 0     | 0     | 0      | 0      | 0       | 0        | 0       |        |
| Os03g43790 | Unknown protein               | 7                  | 241    | 3          | 0         | 0       | 0             | 0       | 0     | 0     | 0      | 0      | 0       | 0        | 0       |        |
| Os03g47910 | Unknown protein               | 807                | 2,357  | 923        | 3         | 0       | 0             | 0       | 0     | 0     | 0      | 0      | 0       | 489      | 0       |        |
| Os03g48200 | Ribosome inactivating protein | 106                | 28     | 0          | 0         | 0       | 0             | 0       | 0     | 0     | 0      | 0      | 0       | 110      | 0       |        |
| Os03g48220 | Unknown protein               | 125                | 179    | 177        | 4         | 0       | 0             | 0       | 0     | 0     | 0      | 0      | 173     | 20       | 0       |        |
| Os03g49600 | β-glucosidase                 | 1,010              | 635    | 171        | 73        | 24      | 39            | 5       | 0     | 0     | 0      | 0      | 34      | 25       | 0       |        |
| Os03g52160 | Unknown protein               | 280                | 43     | 1          | 0         | 0       | 0             | 0       | 0     | 0     | 0      | 0      | 34      | 0        | 0       |        |
| Os03g53310 | Suppressor/enhancer of lin-12 | 161                | 271    | 96         | 203       | 201     | 95            | 51      | 0     | 3     | 0      | 0      | 0       | 33       | 1       |        |
| Os03g60370 | Acid phosphatase              | 114                | 6      | 97         | 9         | 2       | 2             | 4       | 0     | 0     | 0      | 2      | 0       | 2        | 3       |        |
| Os03g63390 | Chemocyanin                   | 3                  | 233    | 31         | 3         | 0       | 0             | 0       | 0     | 0     | 0      | 0      | 0       | 0        | 0       |        |
| Os04g33930 | Lipid binding protein         | 0                  | 0      | 2,114      | 38        | 1       | 0             | 0       | 0     | 0     | 0      | 0      | 0       | 0        | 0       |        |
| Os04g35140 | Protease                      | 1                  | 72     | 172        | 2         | 1       | 6             | 0       | 0     | 0     | 0      | 0      | 0       | 65       | 0       |        |
| Os04g39590 | Arabinogalactan protein       | 0                  | 0      | 2          | 26        | 284     | 44            | 5       | 0     | 0     | 0      | 0      | 0       | 0        | 21      |        |
| Os04g48400 | GMC oxidoreductase            | 135                | 603    | 141        | 2         | 0       | 0             | 0       | 0     | 0     | 0      | 0      | 0       | 551      | 0       |        |
| Os04g55660 | GDSL-like lipase              | 0                  | 26     | 337        | 919       | 25      | 1             | 3       | 0     | 0     | 0      | 0      | 0       | 0        | 10      |        |
| Os04g58120 | Unknown protein               | 4,960              | 243    | 28         | 0         | 0       | 0             | 0       | 0     | 0     | 0      | 0      | 0       | 165      | 0       |        |
| Os05g05920 | Unknown protein               | 0                  | 300    | 48         | 1         | 0       | 0             | 0       | 0     | 0     | 0      | 0      | 0       | 165      | 0       |        |
| Os05g10210 | Glycoprotein                  | 131                | 14     | 2          | 0         | 0       | 0             | 0       | 0     | 0     | 0      | 0      | 25      | 190      | 0       |        |
| Os05g30400 | Unknown protein               | 1,555              | 1      | 59         | 1         | 0       | 0             | 0       | 0     | 0     | 0      | 0      | 0       | 43       | 0       |        |
| Os05g35740 | Subtilisin propeptide domain  | 73                 | 35     | 1,318      | 87        | 27      | 16            | 1       | 58    | 54    | 0      | 0      | 0       | 2        | 0       |        |
| Os05g40010 | Lipid-transfer protein        | 5                  | 381    | 3,165      | 2,495     | 15      | 90            | 0       | 0     | 0     | 0      | 5      | 0       | 18       | 17      |        |
| Os05g44120 | Unknown protein               | 1,750              | 1,003  | 164        | 8         | 1       | 5             | 0       | 0     | 0     | 0      | 0      | 0       | 448      | 0       |        |
| Os05g44760 | Hexokinase                    | 20                 | 55     | 56         | 137       | 524     | 236           | 26      | 0     | 9     | 0      | 1      | 9       | 0        | 32      |        |
| Os06g05740 | Unknown protein               | 276                | 8      | 31         | 7         | 4       | 0             | 3       | 0     | 28    | 0      | 0      | 1       | 0        | 0       |        |
| Os06g42310 | β-galactosidase               | 0                  | 1      | 732        | 5         | 0       | 0             | 40      | 0     | 0     | 0      | 0      | 0       | 0        | 0       |        |
| Os06g44660 | Arabinogalactan protein       | 0                  | 114    | 14         | 557       | 1,196   | 21            | 16      | 0     | 0     | 0      | 0      | 0       | 12       | 54      |        |
| Os06g48020 | Peroxidase                    | 8                  | 36     | 64         | 224       | 72      | 44            | 0       | 11    | 0     | 0      | 0      | 0       | 0        | 11      |        |
| Os07g23730 | Thaumatin-like protein        | 11                 | 8      | 27         | 154       | 37      | 1             | 1       | 0     | 0     | 0      | 0      | 0       | 0        | 2       |        |
| Os07g37850 | Unknown protein               | 143                | 23     | 7,997      | 31        | 0       | 0             | 0       | 0     | 0     | 0      | 0      | 23      | 1,410    | 10      |        |
| Os07g40740 | Heparanase-like protein       | 0                  | 5      | 102        | 947       | 42      | 0             | 1       | 0     | 0     | 0      | 0      | 0       | 0        | 0       |        |
| Os07g41650 | Pectinesterase                | 3                  | 196    | 90         | 213       | 10      | 4             | 0       | 0     | 0     | 0      | 0      | 0       | 111      | 34      |        |
| Os07g46210 | Aspartic acid-rich protein    | 2                  | 5,127  | 2,210      | 26        | 0       | 0             | 0       | 0     | 0     | 0      | 0      | 0       | 25       | 0       |        |
| Os08g02094 | Proline-rich protein          | 332                | 129    | 56         | 83        | 39      | 1             | 0       | 0     | 0     | 0      | 0      | 0       | 0        | 0       |        |
| Os08g10670 | Aspartyl protease             | 223                | 1      | 3          | 0         | 0       | 0             | 0       | 18    | 0     | 0      | 0      | 23      | 149      | 0       |        |
| Os08g27210 | Unknown protein               | 0                  | 118    | 13         | 0         | 0       | 0             | 0       | 0     | 0     | 0      | 0      | 0       | 0        | 0       |        |
| Os08g29770 | Endoglucanase                 | 0                  | 402    | 876        | 1,017     | 164     | 63            | 0       | 16    | 0     | 0      | 0      | 0       | 0        | 0       |        |
| Os08g43290 | Lipid-transfer protein        | 554                | 6,768  | 1,261      | 28        | 0       | 0             | 0       | 0     | 0     | 0      | 0      | 0       | 3,537    | 0       |        |
| Os08g45150 | Proline-rich protein          | 6                  | 1,413  | 5,527      | 2,515     | 1       | 1             | 3       | 0     | 0     | 0      | 0      | 0       | 256      | 0       |        |
| Os09g13930 | Unknown protein               | 14                 | 655    | 6          | 1         | 1       | 2             | 0       | 0     | 0     | 0      | 0      | 0       | 396      | 0       |        |
| Os09g19930 | GMC oxidoreductase            | 124                | 75     | 42         | 58        | 2       | 0             | 0       | 0     | 0     | 0      | 1      | 89      | 0        | 0       |        |
| Os09g30478 | Unknown protein               | 43                 | 102    | 78         | 140       | 105     | 113           | 19      | 0     | 0     | 0      | 0      | 0       | 0        | 0       |        |
| Os09g35700 | Lipid-transfer protein        | 16,153             | 49,751 | 13,603     | 81        | 1       | 4             | 1       | 0     | 0     | 0      | 0      | 0       | 708      | 0       |        |
| Os10g05720 | Lipid binding protein         | 0                  | 79     | 131        | 1,325     | 0       | 0             | 0       | 0     | 0     | 0      | 0      | 0       | 71       | 0       |        |
| Os10g36760 | Peptidase                     | 12                 | 56     | 46         | 103       | 23      | 5             | 1       | 0     | 10    | 0      | 2      | 0       | 0        | 0       |        |
| Os11g33134 | Unknown protein               | 0                  | 1      | 1          | 23        | 182     | 9             | 1       | 0     | 0     | 0      | 0      | 0       | 0        | 16      |        |
| Os12g15470 | Peptidase                     | 10                 | 33     | 96         | 178       | 13      | 23            | 0       | 0     | 6     | 0      | 1      | 0       | 0        | 0       |        |

**Table S4.** Characteristics of rice spikelets and anthers of progressive developmental stages used for the construction of SBS transcriptomes.

Developing anthers (stages)

|          |               | Meiosis | Tetrad          | Early vacu      | Late vacu    | Mitosis | Mature Pollen |
|----------|---------------|---------|-----------------|-----------------|--------------|---------|---------------|
| spikelet | Length (mm)   | 2.7±0.3 | 3.5±0.3         | 4.9±0.3         | 5.9±0.2      | 6.0±0.4 | 6.1±1.4       |
|          | Width (mm)    | 1.5±0.1 | 1.7±0.1         | 2.0±0.1         | 3.0±0.1      | 3.3±0.2 | 3.1±0.3       |
|          | Bracket Color | White   | Yellowish white | Yellowish white | Light green  | Green   | Green         |
| anther   | Length        | 0.6±0.1 | 0.9±0.1         | 1.1±0.1         | 1.4±0.1      | 1.8±0.2 | 2.1±0.1       |
|          | Ratio*        | 0.29    | 0.34            | 0.41            | 0.42         | 0.53    | 0.66          |
|          | Color         | White   | Yellowish white | Yellowish white | Light yellow | Yellow  | Yellow        |

Duration between stages (d)\*\*

|  |     |           |           |           |    |
|--|-----|-----------|-----------|-----------|----|
|  | 1.2 | 0.84-1.23 | 1.59-1.85 | 2.67-3.25 | ~2 |
|--|-----|-----------|-----------|-----------|----|

\*, ratio of the longitudinal lengths of anther and spikelet.

\*\* Durations between stages are averaged values from several collections and depend on the weather and positions of the spikelets on the plants.

**Table S5.** *Primers used for RT-PCR analysis.*

| Gene ID    | Annotation                     | Direction | Primer                   |
|------------|--------------------------------|-----------|--------------------------|
| Os09g35700 | Lipid transfer protein         | F         | GATGGAGATGGTGTGCCAAGG    |
|            |                                | R         | TGAACGATCAGCAGAGCAAGC    |
| Os08g44840 | Acyltransferase                | F         | TTCGACGGGATGGTCTACCTC    |
|            |                                | R         | TAGCAAGCAACAAGGAATCCATG  |
| Os04g48210 | Cytochrome P450                | F         | GCTCATCTCCTTCCCGCTGT     |
|            |                                | R         | TCGTTTCATGCTCCACCGTG     |
| Os05g40010 | Lipid transfer protein         | F         | GTTGCACACAGGAGTTTGAGGT   |
|            |                                | R         | TTGGTGATTGATCGGACAAGC    |
| Os02g07820 | Unknown protein                | F         | GATGAGCTTTCTTGAGCAGGC    |
|            |                                | R         | TGACGCAAGTGTAGCTCTCAGAG  |
| Os11g11710 | Unknown protein                | F         | CTCTGCAACACCTGCTGCC      |
|            |                                | R         | AGGTCTTATCGGCGGTTGATC    |
| Os10g40090 | $\beta$ -expansin              | F         | ATGATCTCCTGCGGCAACG      |
|            |                                | R         | GAGCCCTTCTCGACGTGGA      |
| Os05g46530 | Pectinesterase inhibitor       | F         | TGAAGCTGTTCGATGAGGAAGG   |
|            |                                | R         | CGAGATACGCCACCACTTCTG    |
| Os07g26480 | Desiccation-associated protein | F         | AGCGGCAGCATGGACATCA      |
|            |                                | R         | TTGGACTTCTTGGGCACGG      |
| Os08g03682 | Cytochrome P450                | F         | CGATCATGGGCTACGACATCC    |
|            |                                | R         | AGTCGAAGCAGTGGAAGAGCC    |
| Os01g26000 | Acyltransferases               | F         | GCACAGCTTACTGTTGGAGTACGG |
|            |                                | R         | GGTTGAGGAAGTCGAAGAAGTCG  |
| Os01g12020 | Lipid transfer protein         | F         | CTCCCCTCCTCCACTAGACCAC   |
|            |                                | R         | ACTCGATTCTCAGCTCTCAG     |
| Os01g46950 | Lipid transfer protein         | F         | TCCAGCAAGAGATCCATCAAGC   |
|            |                                | R         | TCTGCCTCACTGAACAATGGTC   |
| Os08g43290 | Lipid transfer protein         | F         | CACACACTCCCATCACTCCA     |
|            |                                | R         | TGTTGAAATCCCTCCTTTGG     |
| Os11g37280 | Lipid transfer protein         | F         | GTGCCGCCTCTCTACTCTTGC    |
|            |                                | R         | CATAGCACGACAGTAGCACGAGC  |
| Os03g50890 | Actin1                         | F         | CCTCTTCCAGCCTTCCTTCAT    |
|            |                                | R         | ACGGCGATAACAGCTCCTCTT    |
